# Supplementary material for: Human-lineage-specific genomic elements are associated with neurodegenerative disease and APOE transcript usage
Source: PubMed Central journal article supplement (PMC8024253; doi:10.1038/s41467-021-22262-5), 2021-04-06
Supplement: 41467_2021_22262_MOESM1_ESM.pdf [file 41467_2021_22262_MOESM1_ESM.pdf]

## Supplementary Figures

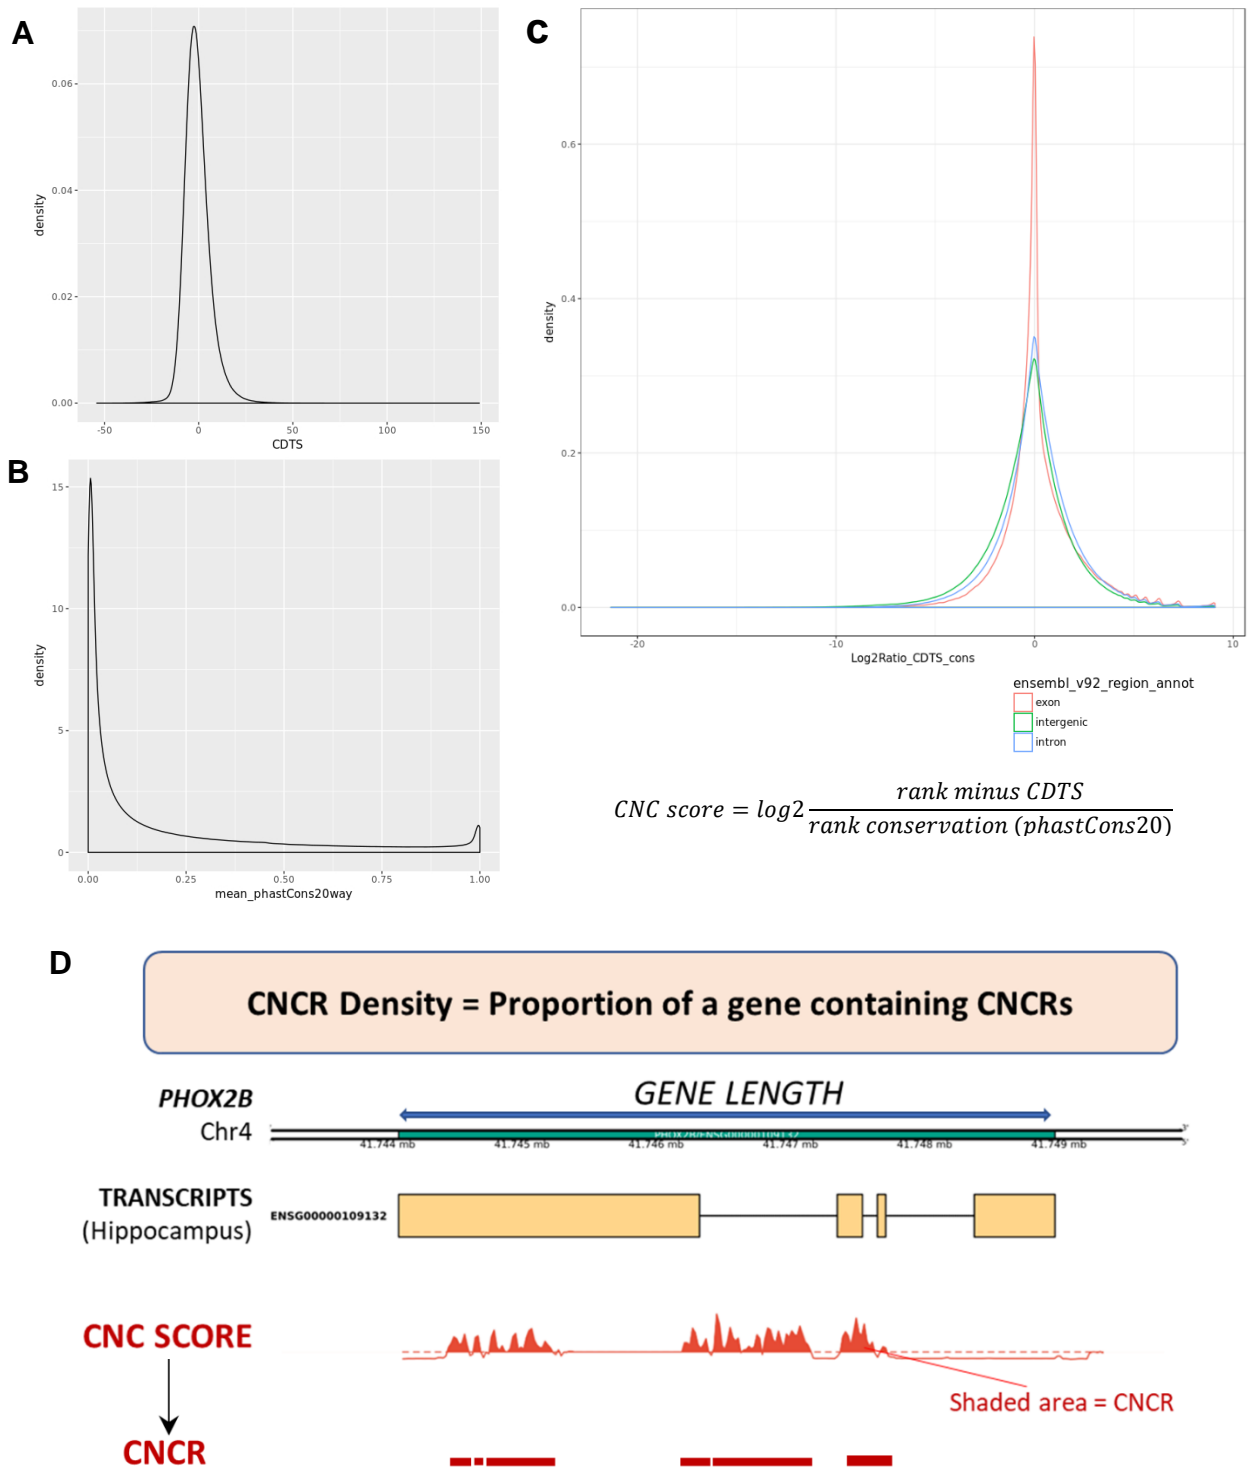

**Supplementary Figure 1. Kernel density plots of annotation metrics and explanation of constrained, non-conserved regions (CNCR) density metric.** Panel a depicts density plot of genomic constraint (context dependent tolerance score (CDTS): a lower CDTs represents more constrained data). Panel b shows the density distribution of the mean phastCons20 scores per 10bp bin with a score of 1 showing higher conservation than 0. Panel c shows the distribution of  $\log_2$  ratio (constrained, non-conserved (CNC) score) of the reverse ranked CDTs (so a higher rank pertains to higher constraint but lower CDTs) and ranked phastCons20 scores, partitioned by regions of exon,

intron and intergenic as defined by Ensembl v.92. Panel **d** provides a schematic explanation for how the CNCR density is calculated, using *PHOX2B* gene as an example. The CNCR density is calculated using the number of CNCRs within a gene (shown in the shaded area in the figure from the CNC track and also shown as a separate CNCR track where each bar represents a region fulfilling criteria for CNCR), divided by the total gene length (shown in the top track of the figure).

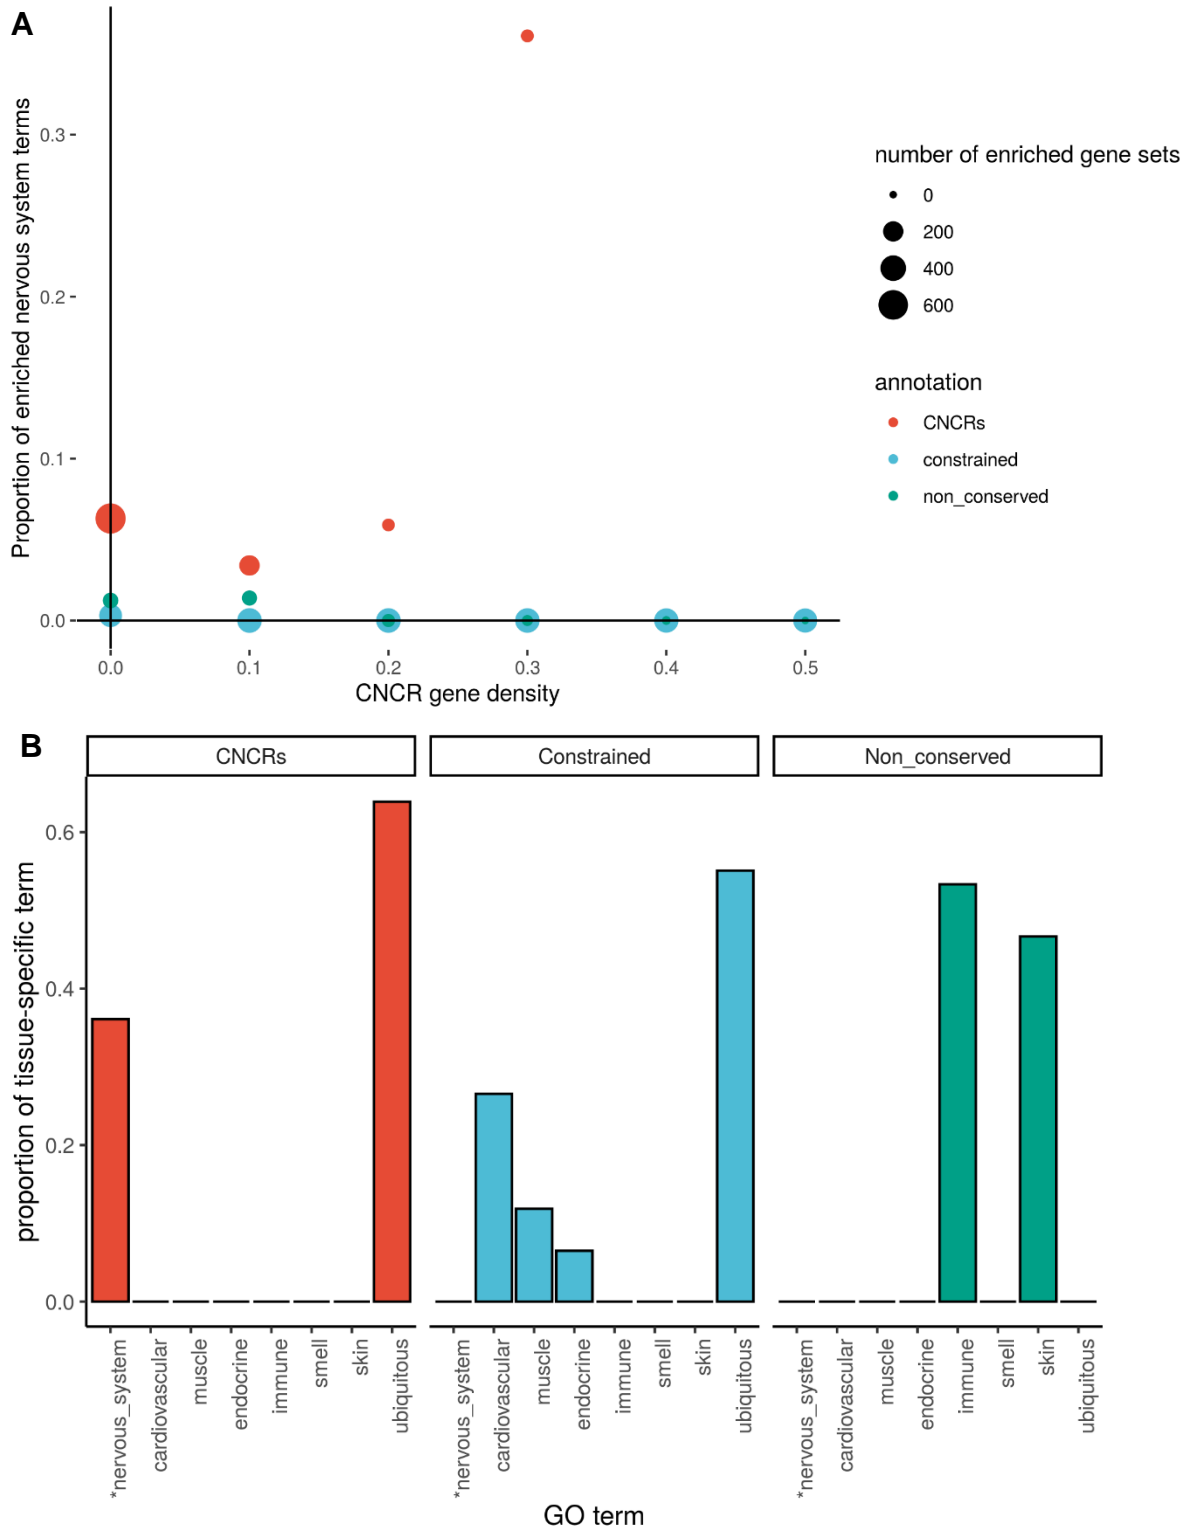

**Supplementary Figure 2. Proportion of enriched neurologically-related gene ontology (GO) terms in the gene set analysis compared between the annotation of interest (constrained, non-conserved regions: CNCRs) and the comparator annotation sets (a). Proportion of neurologically-related GO terms at CNCR density of 0.3 and above (b).**

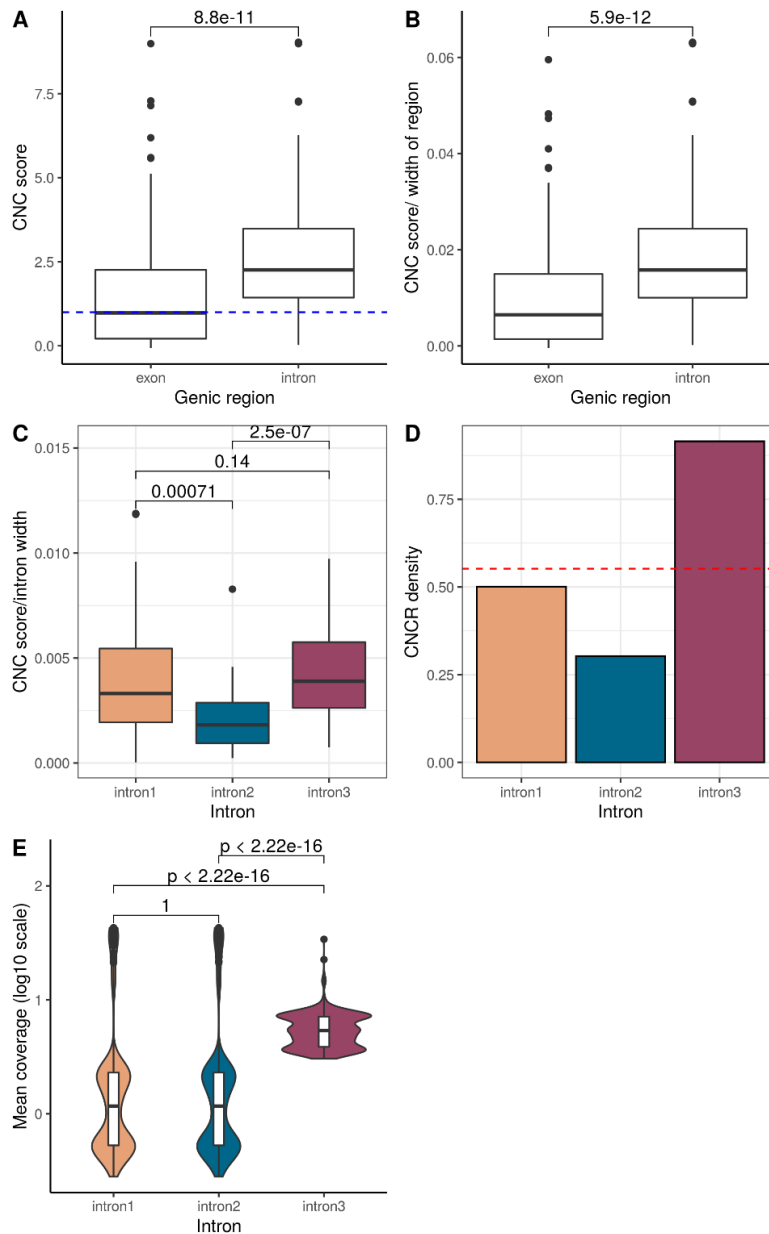

**Supplementary Figure 3. Justification for further intragenic analysis of the intron-3 retention event in *APOE*.** Panel A shows boxplot comparing constrained, non-conserved (CNC) scores across all *APOE* exonic and intronic regions with the blue dashed line showing a CNC score of 1 that is used as the cut-off for defining constrained, non-conserved regions (CNCRs). The number above the square brackets denotes the Wilcoxon rank sum test p-value comparing the two groups. Panel B shows the CNC score normalised for the width of each genic region. The number above the square brackets denotes the Wilcoxon rank sum test p-value comparing the two groups. Panel C shows the CNC score normalised for width of each individual intron across the three introns of *APOE* ENST00000252486. The number above the square brackets denotes the Wilcoxon rank sum test p-value comparing the two groups. Panel D shows the local CNCR density for each intron within *APOE* ENST00000252486. The red dashed line shows the CNCR density across the entire *APOE* gene. Panel E shows the log<sub>10</sub> mean coverage of the three different *APOE* introns within GTEx hippocampal tissue. The number above the square brackets denotes the Wilcoxon rank sum test p-value comparing each of the two groups.

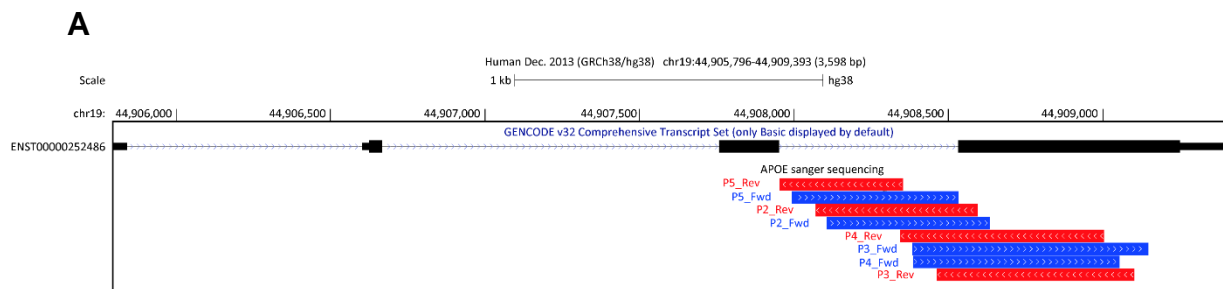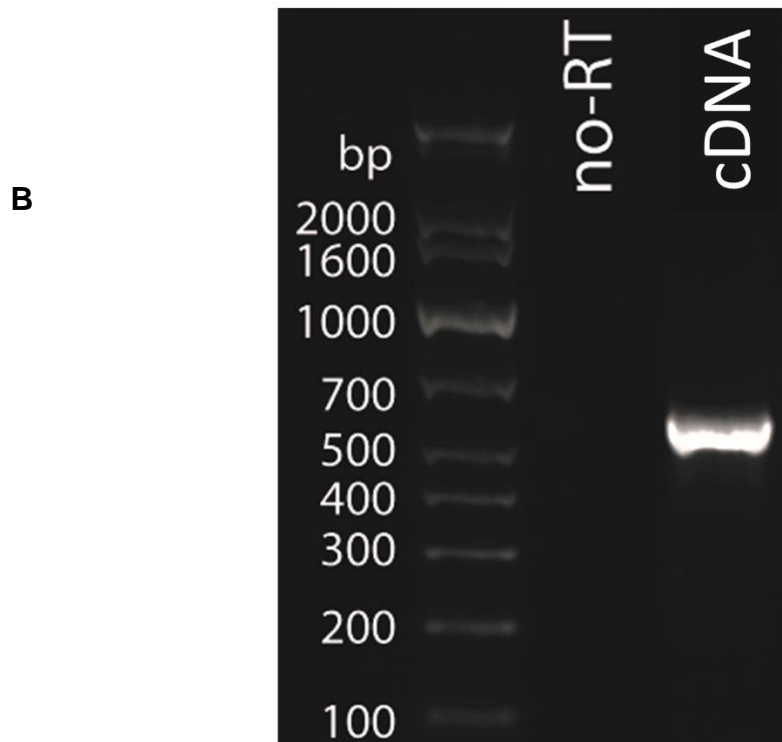

**Supplementary Figure 4.** Panel a: Sanger sequencing of human hippocampus cDNA using targeted primers within *APOE*, aligned to hg38. Panel b: Gel electrophoresis results of PCR amplification using P2 primer pair for a no-reverse transcriptase (no-RT) control (poly-A selected RNA) (lane labelled “no-RT”) and for cDNA (lane labelled “cDNA”). Four different primer pairs (as listed in Supplementary Table 3) were used once each.

**A**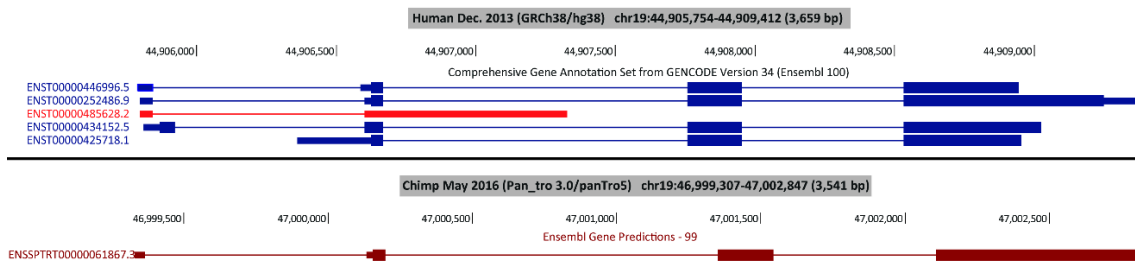**B**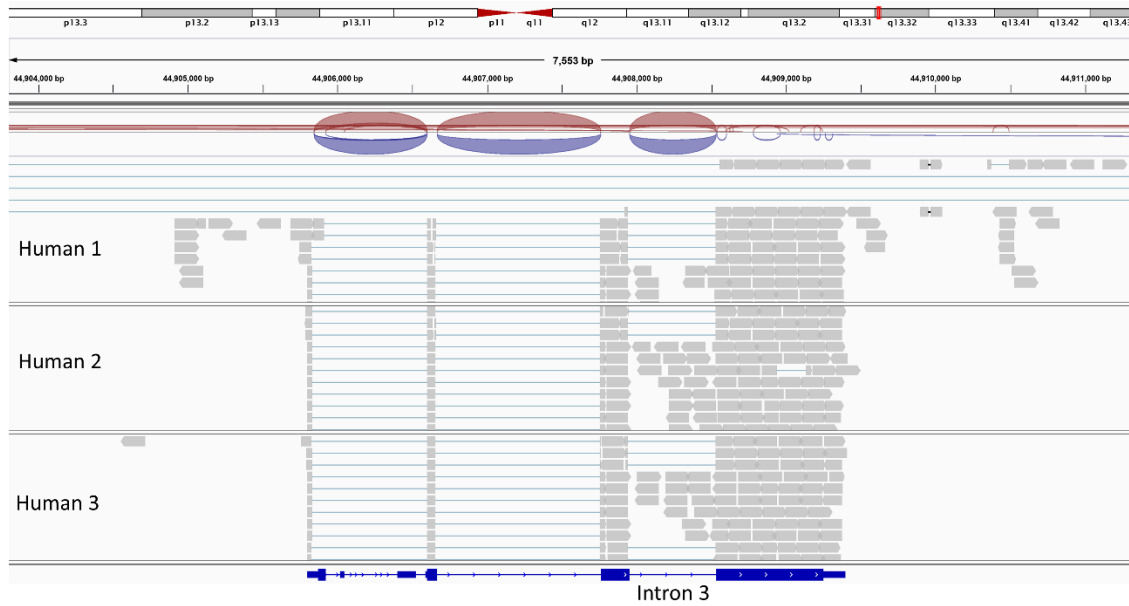**C**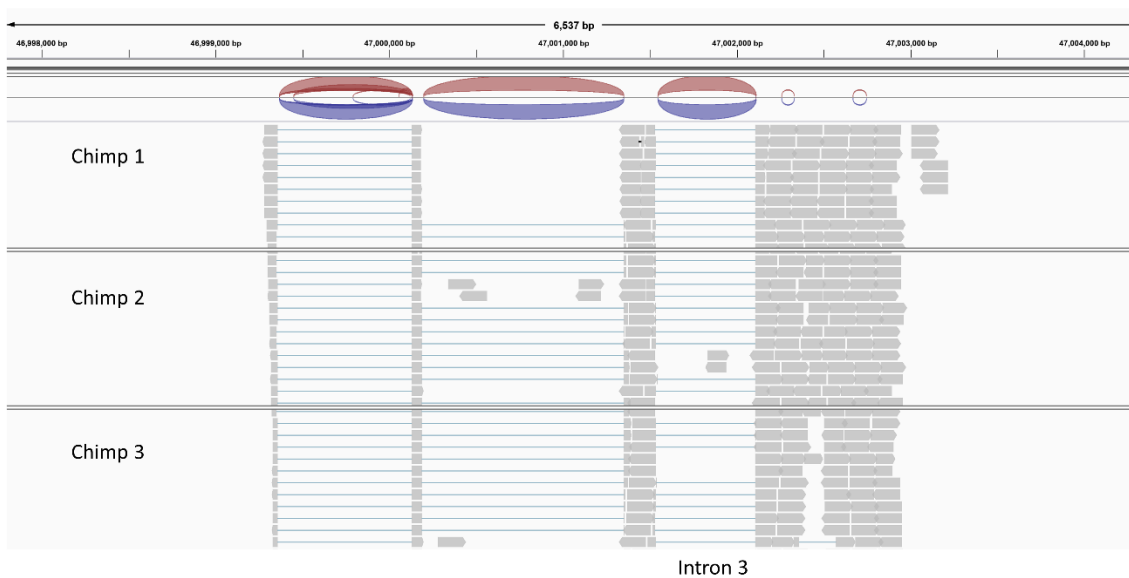

**Supplementary Figure 5.** (a) Schematic representation of annotated transcripts for both human and chimpanzee in Ensembl GRCh38 and pan\_tro 3.0. (b) Selected representations of the alignments of three human hippocampal bulk RNA-sequencing reads from Khrameeva *et al.*<sup>1</sup> across *APOE* with reads spanning over intron 3 present taken from Integrative Genome Viewer. (c) Selected representations of the alignments of three chimpanzee hippocampal bulk RNA-sequencing reads across *APOE* with occasional reads spanning over intron 3.

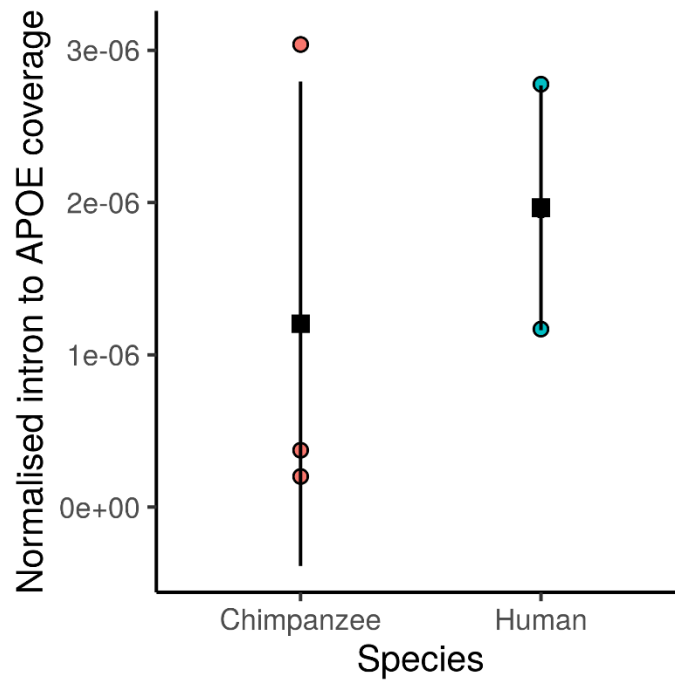

**Supplementary Figure 6. Comparison of the intron-3 coverage: *APOE* coverage normalised for the intronic length of intron-3 across all three human and all three chimpanzee samples.** Values for the samples are represented using the round points. The black square represents the mean of the datapoints with the black vertical lines extending to the mean  $\pm$  standard error of the mean. There were no statistically significant differences between the mean intron retention event between humans and chimpanzees (Wilcoxon rank sum p-value = 0.7).

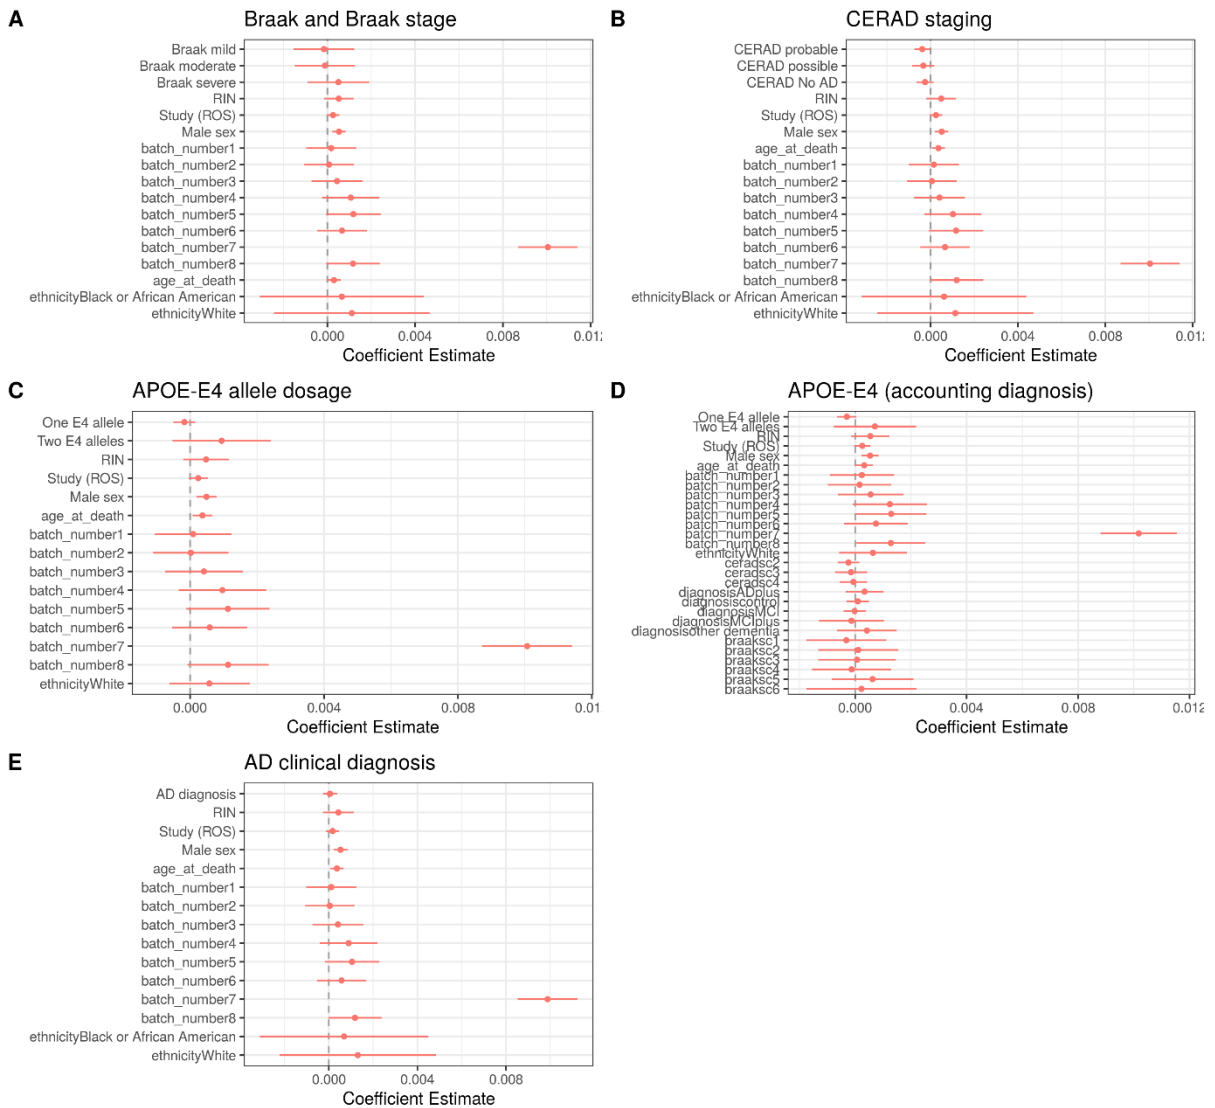

**Supplementary Figure 7: Coefficient effect estimates for covariates (red dot) +/- 95% confidence interval (horizontal line) from ROSMAP bulk RNA-sequencing studies of dorsolateral frontal cortex tissue using linear regression models to interrogate the relationship between *APOE* intron-3 retention usage and Braak and Braak stage (Panel A); CERAD staging (Panel B); *APOE*- $\epsilon$ 4 allele dosage with conventional ROSMAP covariates (Panel C); *APOE*- $\epsilon$ 4 allele dosage with conventional ROSMAP covariates and additional covariates incorporated for Alzheimer’s disease diagnosis, CERAD and Braak and Braak staging (Panel D); and clinical Alzheimer’s disease diagnosis (Panel E).**



## Supplementary Tables

**Supplementary Table 1. Annotation priority order for genomic feature.** Genomic features are based on both Gencode and Ensembl. A priority order for annotation with a genomic feature is assigned to avoid conflict with overlapping features as used in di Iulio *et al.*<sup>2</sup> The number of 10bp bins for each genomic feature across the genome is also shown in the table.

| Annotation priority order | Genomic feature   | Number of 10bp bins | Description                                              |
|---------------------------|-------------------|---------------------|----------------------------------------------------------|
| 1                         | Exon PCCDS        | 1,453,269           | Exon, protein-coding sequence                            |
| 2                         | Exon NCRNA        | 1,156,726           | Exon, non-coding RNA, e.g. lincRNA                       |
| 3                         | Exon PCUTR        | 892,210             | Exon, protein-coding UTR                                 |
| 4                         | Promoter          | 820,321             | Promoter                                                 |
| 5                         | Promoter Flanking | 1,074,641           | Cluster with promoters or distal cis-regulatory elements |
| 6                         | Enhancer          | 251,636             | Enhancer                                                 |
| 7                         | Intron, cis       | 108,670             | Introns located in genes <10bp from splice-site          |
| 8                         | Intron, trans     | 15,204,447          | Introns located in genes >10bp from splice-site          |
| 9                         | Intergenic        | 689,419             | Not annotated in GenCode/ Ensembl                        |
| 10                        | H3K9me3           | 2,082,553           | Only overlap with H3K9me3                                |
| 11                        | H3K27me3          | 777,409             | Only overlap with H3K27me3                               |
| 12                        | Multiple histones | 5,199,455           | Overlap with a combination of histone marks              |
| 13                        | Other             | 1,404,860           | Includes open chromatin and unannotated features         |

**Supplementary Table 2. Genome-wide association studies used in the stratified linkage-disequilibrium score regression (s-LDSC) analysis.** The GWAS for Parkinson’s disease and major depressive disorder do not incorporate 23&Me data.

| Phenotype                       | Author, Year, Reference                          | n case  |
|---------------------------------|--------------------------------------------------|---------|
| Intelligence test               | Savage, 2018 <sup>24</sup>                       | 269,858 |
| Alzheimer’s disease (AD)        | Jansen, 2019 <sup>25</sup>                       | 71,880  |
| Parkinson’s disease (PD)        | Nalls, 2019 (excluding 23&Me data) <sup>26</sup> | 33,674  |
| Major depressive disorder (MDD) | Wray, 2018 (excluding 23&Me data) <sup>28</sup>  | 59,851  |
| Schizophrenia (SCZ)             | Pardiñas, 2018 <sup>27</sup>                     | 40,675  |

**Supplementary Table 3. Primer positions and sequences used to validate the *APOE* intron-3 retention event.**

| Primer name   | 5’ – 3’ sequence      | Strand | Chr: Start-End (hg38) |
|---------------|-----------------------|--------|-----------------------|
| <b>P2_Fwd</b> | GGTTCTAGCTTCCTCTTCCC  | +      | 19:44908064-44908083  |
| <b>P2_Rev</b> | CGCCTGCAGCTCCTTGGACAG | -      | 19:44908627-44908647  |
| <b>P3_Fwd</b> | CCTAGCTCCTTCTTCGTCTC  | +      | 19:44908337-44908356  |
| <b>P3_Rev</b> | CTCGAACCAGCTCTTGAGG   | -      | 19:44909130-44909148  |
| <b>P4_Fwd</b> | CCTTCTTCGTCTCTGCCTC   | +      | 19:44908344-44908362  |
| <b>P4_Rev</b> | CTGCTCCTTACCTCGTC     | -      | 19:44909037-44909055  |
| <b>P5_Fwd</b> | GTGAGTGTCCCCATCCTGG   | +      | 19:44907953-4490771   |
| <b>P5_Rev</b> | CTGCGGCCGAGAGGGCGGGAG | -      | 19:44908512-44908532  |



**Supplementary Table 4. Results for heritability, enrichment, and regression coefficient from stratified linkage-disequilibrium score regression (s-LDSC) analysis.** The coefficient p-values are one-sided p-values calculated from the coefficient Z-score.

| Annotation    | GWAS                | Proportion SNPs | Proportion heritability | Enrichment | Enrichment p-value | Regression Coefficient | Coefficient Z-score | Z- score -log P-value |
|---------------|---------------------|-----------------|-------------------------|------------|--------------------|------------------------|---------------------|-----------------------|
| CNCR          | Intelligence 2018   | 0.031           | 0.339                   | 11.044     | 5.12E-20           | 2.96E-07               | 10.059              | 23.378                |
| Constrained   |                     | 0.055           | 0.441                   | 8.066      | 3.20E-21           | 1.85E-07               | 9.413               | 20.618                |
| Non-conserved |                     | 0.126           | 0.330                   | 2.628      | 1.32E-05           | 6.28E-08               | 5.125               | 6.828                 |
| CNCR          | AD 2019             | 0.031           | 0.398                   | 12.974     | 0.00987            | 1.89E-08               | 1.961               | 1.603                 |
| Constrained   |                     | 0.055           | 0.532                   | 9.733      | 0.00196            | 1.12E-08               | 1.965               | 1.607                 |
| Non-conserved |                     | 0.126           | -0.341                  | -2.713     | 0.216              | -8.51E-09              | -1.585              | 0.025                 |
| CNCR          | PD 2019 (ex.23&Me)  | 0.031           | 0.334                   | 10.884     | 0.00193            | 2.57E-08               | 2.767               | 2.548                 |
| Constrained   |                     | 0.055           | 0.367                   | 6.715      | 0.00881            | 1.32E-08               | 2.080               | 1.727                 |
| Non-conserved |                     | 0.126           | 0.149                   | 1.191      | 0.857              | 1.28E-10               | 0.037               | 0.314                 |
| CNCR          | MDD 2018 (ex.23&Me) | 0.031           | 0.330                   | 10.755     | 1.39E-07           | 1.13E-07               | 5.422               | 7.530                 |
| Constrained   |                     | 0.055           | 0.404                   | 7.379      | 1.51E-08           | 6.29E-08               | 4.941               | 6.410                 |
| Non-conserved |                     | 0.126           | 0.433                   | 3.446      | 5.02E-04           | 3.84E-08               | 3.908               | 4.333                 |
| CNCR          | SCZ 2018            | 0.031           | 0.339                   | 11.033     | 2.50E-16           | 6.53E-07               | 8.829               | 18.279                |
| Constrained   |                     | 0.055           | 0.425                   | 7.772      | 2.19E-17           | 4.04E-07               | 8.456               | 16.860                |
| Non-conserved |                     | 0.126           | 0.309                   | 2.461      | 8.75E-04           | 1.18E-07               | 3.576               | 3.759                 |

**Supplementary Table 5. Significantly enriched nervous system-related gene ontology (GO) terms for constrained, non-conserved regions (CNCRs) at density of 0.3.** P-value relates to the p-value for enrichment calculated using g:Profiler and its own g:SCS correction method<sup>3</sup>.

| <b>GO ID</b> | <b>GO term description</b>                       | <b>P-value</b> |
|--------------|--------------------------------------------------|----------------|
| GO:0048663   | neuron fate commitment                           | 5.46E-07       |
| GO:0048665   | neuron fate specification                        | 0.0012         |
| GO:0021510   | spinal cord development                          | 0.00129        |
| GO:0021517   | ventral spinal cord development                  | 0.00175        |
| GO:0021515   | cell differentiation in spinal cord              | 3.64E-07       |
| GO:0021953   | central nervous system neuron differentiation    | 7.44E-05       |
| GO:0021522   | spinal cord motor neuron differentiation         | 3.48E-04       |
| GO:0021520   | spinal cord motor neuron cell fate specification | 0.0479         |
| GO:0021527   | spinal cord association neuron differentiation   | 0.00533        |
| GO:0021871   | forebrain regionalization                        | 7.91E-05       |
| GO:0021978   | telencephalon regionalization                    | 0.00313        |
| GO:0030902   | hindbrain development                            | 0.0337         |
| GO:0021536   | diencephalon development                         | 0.045          |

**Supplementary Table 6. Wilcoxon rank sum test pairwise comparison p-values for the normalised intron-3 coverage to junction ratio between different GTEx brain tissues.** Significant p-values (<0.05) are highlighted in orange. The three brain regions with the highest normalised intron-3 coverage to junction ratio, namely the spinal cord, substantia nigra and hippocampus, are the only three regions in which the ratio is statistically significantly higher than all regions that have a normalised ratio lower than the median normalised ratio across all brain regions. These regions are the nucleus accumbens, putamen, anterior cingulate cortex, frontal cortex and cerebellar hemisphere.

|                                                        |                                                        |                |                           |          |                   |                                                         |          |              |             |                  |             |  |
|--------------------------------------------------------|--------------------------------------------------------|----------------|---------------------------|----------|-------------------|---------------------------------------------------------|----------|--------------|-------------|------------------|-------------|--|
| Cerebellar Hemisphere                                  |                                                        |                |                           |          |                   |                                                         |          |              |             |                  |             |  |
| Frontal Cortex                                         | 0.85                                                   |                |                           |          |                   |                                                         |          |              |             |                  |             |  |
| Anterior cingulate cortex                              | 0.29                                                   | 0.46           |                           |          |                   |                                                         |          |              |             |                  |             |  |
| Putamen                                                | 0.04                                                   | 0.094          | 0.38                      |          |                   |                                                         |          |              |             |                  |             |  |
| Nucleus accumbens                                      | 0.0018                                                 | 0.0064         | 0.081                     | 0.58     |                   |                                                         |          |              |             |                  |             |  |
| Amygdala                                               | 0.00019                                                | 0.0013         | 0.0093                    | 0.087    | 0.2               |                                                         |          |              |             |                  |             |  |
| Caudate                                                | 5.90E-05                                               | 0.00044        | 0.0092                    | 0.13     | 0.29              | 0.64                                                    |          |              |             |                  |             |  |
| Hypothalamus                                           | 0.00097                                                | 0.004          | 0.027                     | 0.15     | 0.29              | 0.8                                                     | 0.89     |              |             |                  |             |  |
| Hippocampus                                            | 4.10E-07                                               | 3.90E-06       | 0.00024                   | 0.0064   | 0.014             | 0.47                                                    | 0.19     | 0.32         |             |                  |             |  |
| Substantia nigra                                       | 1.80E-06                                               | 2.50E-05       | 0.0004                    | 0.0096   | 0.015             | 0.39                                                    | 0.15     | 0.29         | 0.85        |                  |             |  |
| Spinal cord                                            | 1.10E-14                                               | 9.00E-14       | 9.00E-12                  | 3.00E-10 | 3.10E-10          | 9.00E-07                                                | 7.60E-09 | 1.10E-07     | 1.20E-06    | 1.20E-05         |             |  |
| Pair-wise comparisons p-value (Wilcoxon rank sum test) | Cerebellar Hemisphere                                  | Frontal Cortex | Anterior cingulate cortex | Putamen  | Nucleus accumbens | Amygdala                                                | Caudate  | Hypothalamus | Hippocampus | Substantia nigra | Spinal cord |  |
|                                                        | Ratio lower than median ratio across all brain tissues |                |                           |          |                   | Ratio higher than median ratio across all brain tissues |          |              |             |                  |             |  |

## Supplementary References

- 1 Khrameeva, E. *et al.* Single-cell-resolution transcriptome map of human, chimpanzee, bonobo, and macaque brains. *Genome research* **30**, 776-789, doi:10.1101/gr.256958.119 (2020).
- 2 di Iulio, J. *et al.* The human noncoding genome defined by genetic diversity. *Nature genetics* **50**, 333-337, doi:10.1038/s41588-018-0062-7 (2018).
- 3 Reimand, J. *et al.* g:Profiler-a web server for functional interpretation of gene lists (2016 update). *Nucleic Acids Res* **44**, W83-89, doi:10.1093/nar/gkw199 (2016).
